# Supplementary material
Source: PubMed Central journal article supplement (PMC7314500)

OTX2 Ki67 DAPI

Elavl3/4 Ki67 DAPI

Crx Ki67 DAPI

Recoverin Ki67 DAPI

WT

RB1<sup>-/-</sup>

WT

RB1<sup>-/-</sup>

WT

RB1<sup>-/-</sup>

WT

RB1<sup>-/-</sup>

Day 60

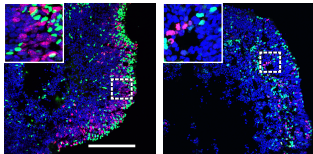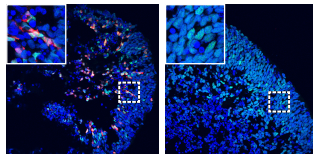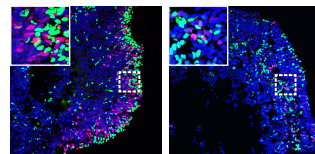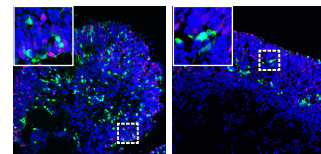

Day 90

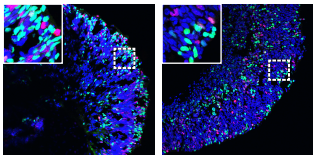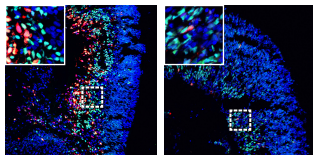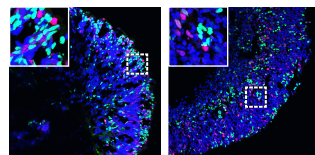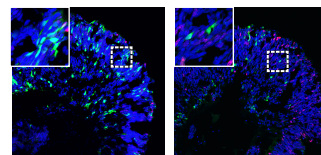

Supplement: NIHMS1578077-supplement-3.pdf [file NIHMS1578077-supplement-3.pdf]
