# Supplementary material
Source: PubMed Central journal article supplement (PMC7314500)

Chx10 DAPI

Pax6 DAPI

Recoverin DAPI

Day 60

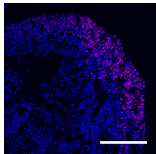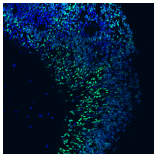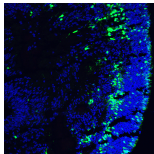

Day 90

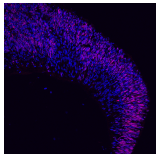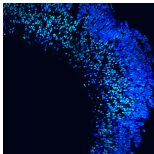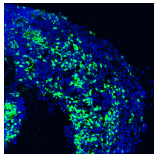

Supplement: NIHMS1578077-supplement-2.pdf [file NIHMS1578077-supplement-2.pdf]

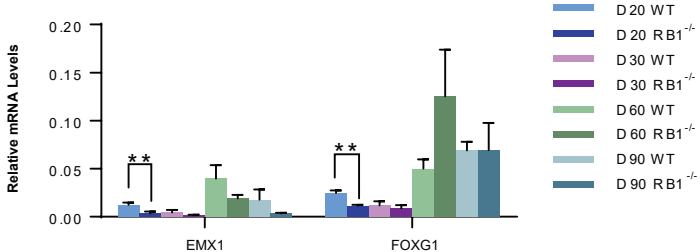

Supplement: NIHMS1578077-supplement-4.pdf [file NIHMS1578077-supplement-4.pdf]
